# Supplementary material for: Exploring the Mechanism of Echinatin against Cervical Cancer Based on Network Pharmacology
Source: Hindawi journal article supplement (doi:10.1155/2024/7008847), 2024-01-01
Supplement: f1 [file 7008847.f1.docx]

Exploring the Mechanism of Echinatin Against Cervical Cancer Based on Network Pharmacology

Hu Chen1 and Jinlei Wang1*

1Department 1 of Gynecology, Shengli Oilfield Central Hospital, 31 Jinan Road, Dongying City257000, Shandong Province, China

Correspondence should be addressed to Jinlei Wang, [202213120153@stu.qlu.edu.cn](mailto:202213120153@stu.qlu.edu.cn)


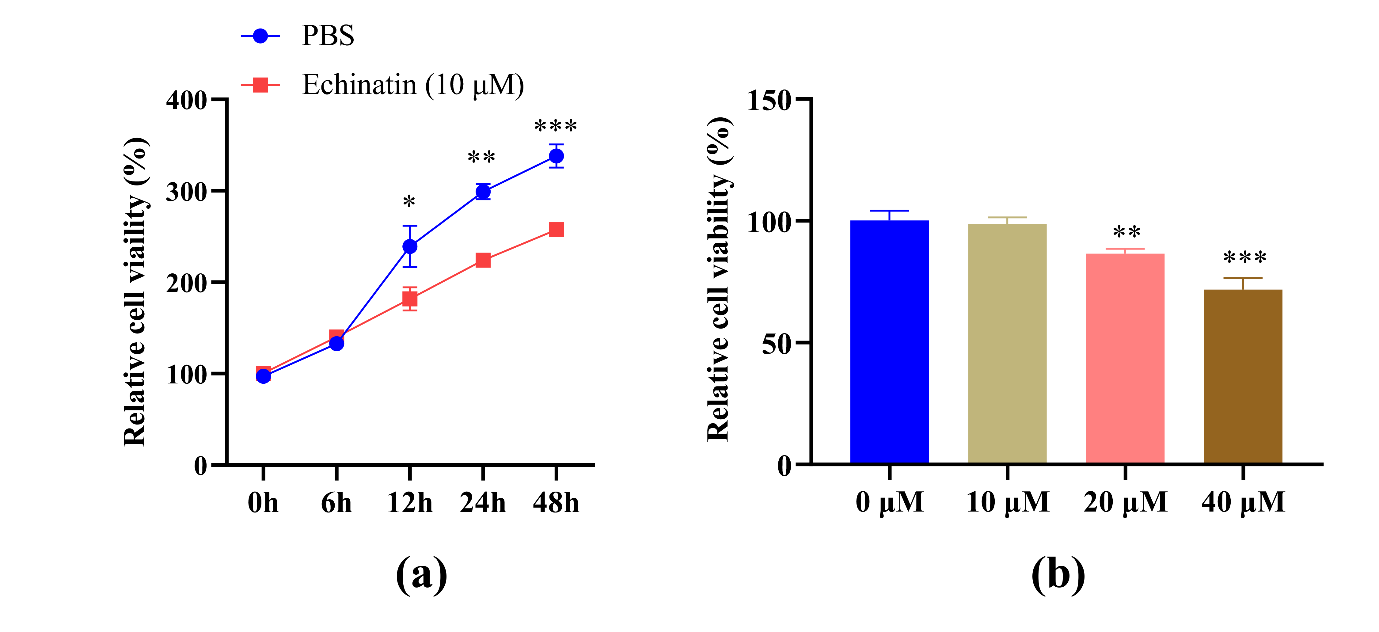


Supplementary Figure 1: CCK-8 testing was performed to investigate the inhibitory effect of Echinatin on cervical cancer cells. (A) Echinatin was added at a concentration of 10μM at 0, 6h, 12h, 24h, and 48h to evaluate its inhibitory effect on cervical cancer cells in HeLa. (B) Various concentrations of Echinatin (10μM, 20μM, 40μM) were added at 48h to assess their inhibitory effects on cervical cancer cells in HeLa.
